# Supplementary material for: Barriers Facing Direct Support Professionals When Supporting Older Adults Presenting with Intellectual Disabilities and Unusual Dementia-Related Behavior: A Multi-Site, Multi-Methods Study
Source: MDPI journal article supplement (doi:10.3390/disabilities2040047), 2022-11-01
Supplement: s1 [file s1]

Archive with 1 entries (1 files):
- disabilities-1911948-supplementary.pdf
